# Supplementary material for: A New Setup for Simulating the Corrosion Behavior of Orthodontic Wires
Source: MDPI journal article supplement (doi:10.3390/ma14133758), 2021-07-05
Supplement: s1 [file s1]

## Article

# A New Setup for Simulating the Corrosion Behavior of Orthodontic Wires

Polydefkis Papaioannou <sup>1,2</sup>, Mona Sütel <sup>2</sup>, Katrin Hüsker <sup>3</sup>, Wolf-Dieter Müller <sup>2</sup> and Theodosia Bartzela <sup>1,\*</sup>

<sup>1</sup> Department of Orthodontics, Dentofacial Orthopedics, and Pedodontics, Charité – Universitätsmedizin Berlin, corporate member of Freie Universität Berlin, Humboldt-Universität zu Berlin, and the Berlin Institute of Health, CC3 Institute of Dental and Craniofacial Sciences, Assmannshauser Str. 4–6, 19147 Berlin, Germany; polydefkis.papaioannou@charite.de (P.P.); theodosia.bartzela@charite.de (T.B.)

<sup>2</sup> Department of Dental, Oral and Maxillary Medicine, Charité – Universitätsmedizin Berlin, corporate member of Freie Universität Berlin, Humboldt-Universität zu Berlin, and the Berlin Institute of Health, CC3 Institute of Dental and Craniofacial Sciences, Assmannshauser Str. 4–6, 19147 Berlin, Germany; polydefkis.papaioannou@charite.de; mona.suetel@charite.de (M.S.); wolf-dieter.mueller@charite.de (W.-D.M.)

<sup>3</sup> Department of Immunology, IMD Institute of Medical Diagnostics Berlin-Potsdam GbR, 12247 Berlin, Germany; k.hueske@imd-berlin.de

\* Correspondence: theodosia.bartzela@charite.de

## Supplementary Materials A:

### CELL INFO

Surface Area measured from microscope.

**Density calculated using:-** WT % of alloy from EDX measurement.

An example with NiTi: Density of : Ti - 4.51 g/cm<sup>3</sup>

Ni - 8.91 g/cm<sup>3</sup>

WT: 47.33% Ti and 52.67% Ni

$0.47 \times 4.50 + 0.53 \times 8.91 = 6.8373 \text{ g/cm}^3$

**Equivalent Mass Calculation:** AT% from EDX used for equivalent mass calculation.

Molecular weight of Ti: 47.88 g/mol n = 4 electrons

Ni: 58.69 g/mol n = 2 electrons

$0.52 \times 47.88 / 4 + 0.48 \times 58.69 / 2 = 20.31 \text{ g}$

**Figure S1.** An example of the cell information that were used with Corroview to estimate polarization resistance (Rp), corrosion current density (icorr) (corrosion current density (I<sub>0</sub>).

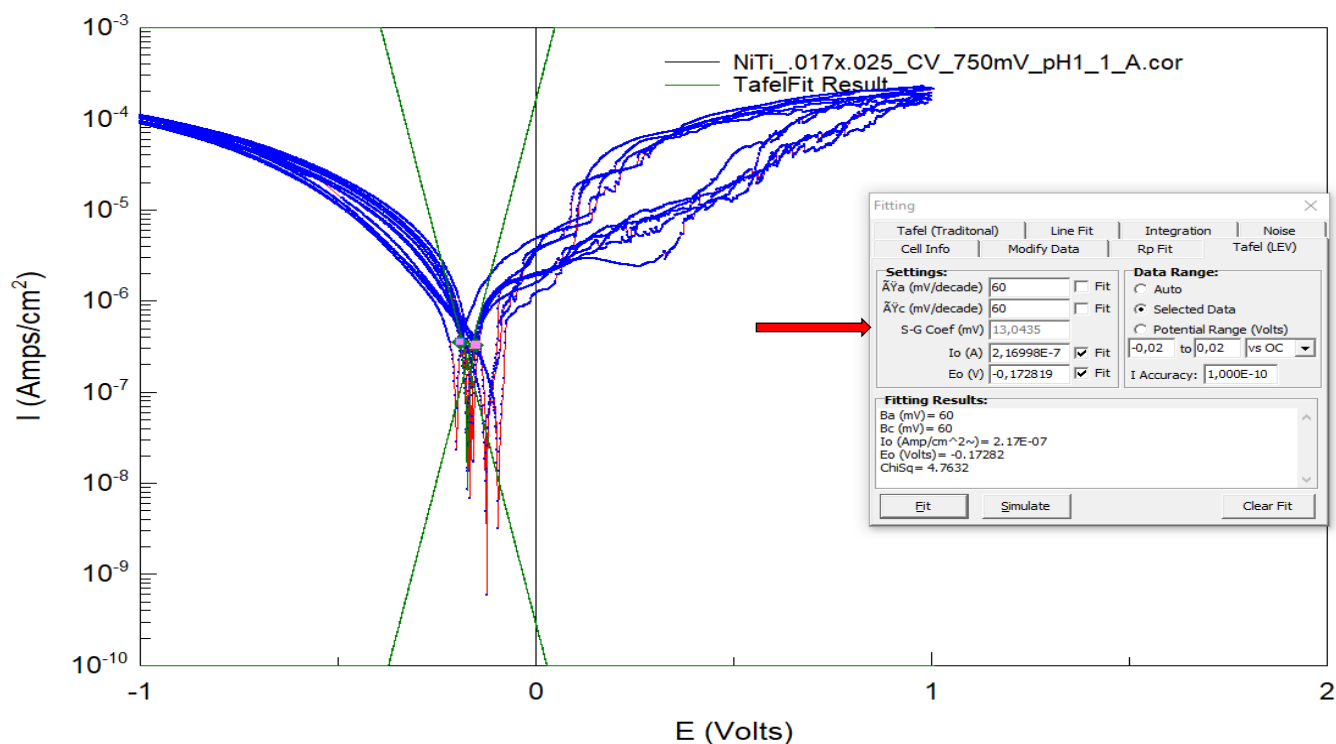

**Figure S2.** An example of the two-point is marked on the curve, and the "Tafel LEV" option is used to obtain the Stern coefficient.

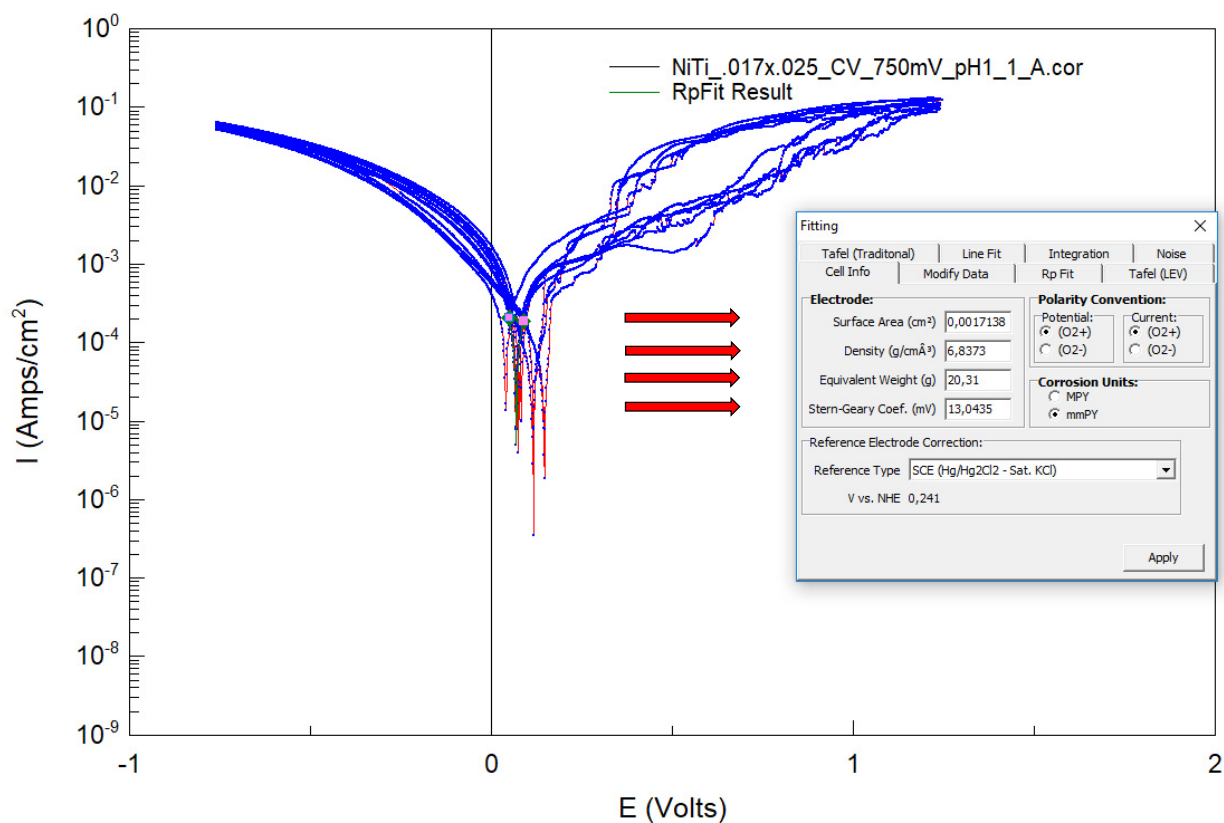

**Figure S3.** An example of cell information marked with red arrows.

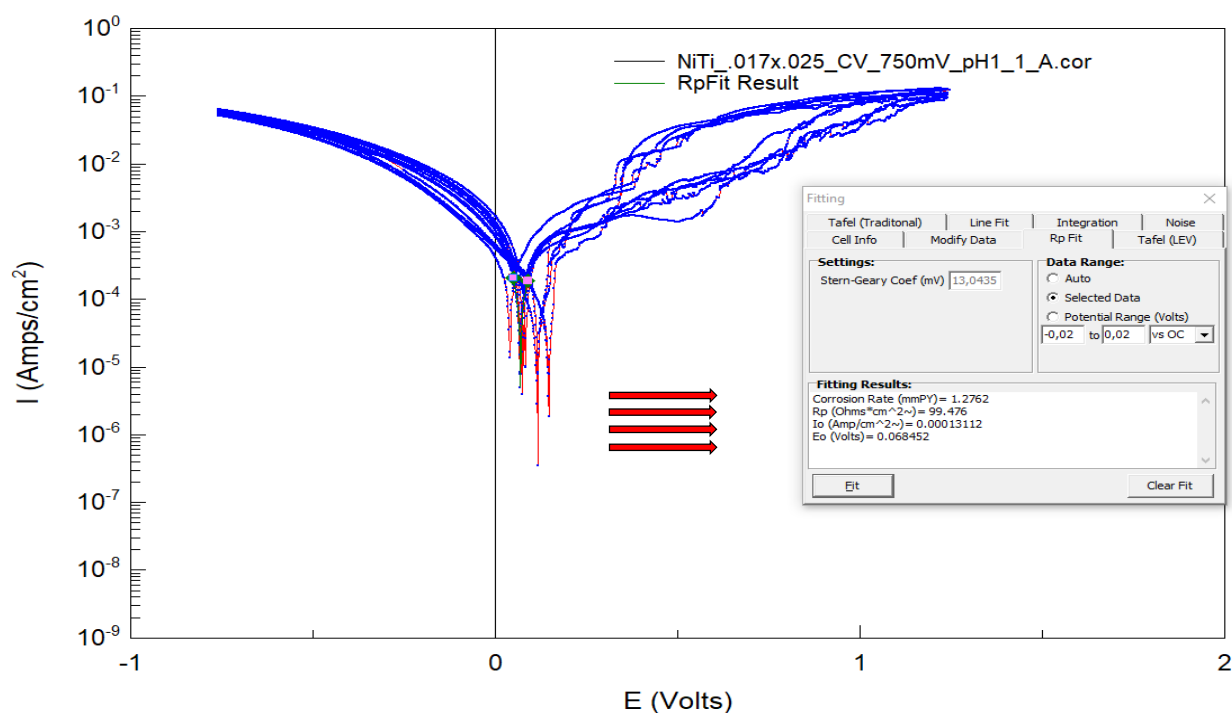

**Figure S4.** An example of the corrosion rate, polarization resistance ( $R_p$ ), corrosion current density ( $I_o$ ), and corrosion potential ( $E_o$ ) calculation using “RP – Fit”; the results are marked with red arrows.

## Supplementary Materials B:

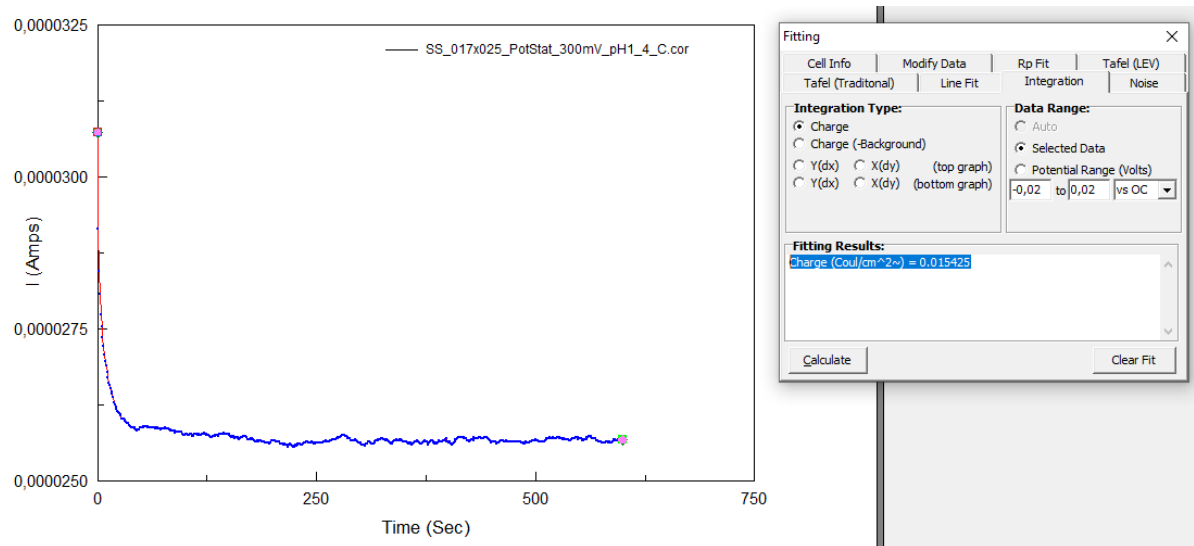

**Figure S5.** An example of the calculation of  $Q$  from  $I$  versus time curve using “RP – Fit”.

[illegible]
